# Supplementary material
Source: PubMed Central journal article supplement (PMC6646067)
Supplement: NIHMS1532932-supplement-2.pdf [file NIHMS1532932-supplement-2.pdf]

## Supplemental information:

Figure S1. (A) General hnRNP L-binding CARE pattern and experimentally validated hnRNP L target mRNAs and CARE sequences. (B) Sequences of the CARE and GAIT element in DNMT1L and PHF21A. Potential miRNA targeting sequences that are overlapped with the GAIT element. (C) Putative GAIT element structures of DNMT1L and PHF21A.

Figure S2. (A) Gene knockdown efficiency of hnRNP L siRNAs. The hnRNP L siRNA #3 was used. (B) mRNA expression of DNMT1L and PHF21A under treatment of IFN- $\gamma$  and hypoxia. (C) Src kinase activity is required for hnRNP L-VEGFA interaction. U937 cells were cultured in Hpx. for 24 h with herbimycin A (1  $\mu$ M) or PF-573228 (500 nM). Lysates were subjected to IP with anti-hnRNP L antibody, and qRT-PCR using VEGFA-specific probe.

Table S1. Translation state analysis of hypoxia-induced translational activated mRNAs. List of mRNAs whose translation efficiency is up- or down-regulated by hypoxia.

Table S2. CARE pattern search across human 3'-UTR database (PACdb and UTRef databases). The gene symbols of 6036 unique genes are listed. CARE sequences and positions were shown for the five novel hnRNP L-directed RNA switch mRNAs and miR-297 target sites were highlighted in red for CDK6, EIF5, and MKLN1.

Table S3. PatSearch analysis of human 3'-UTRs containing putative GAIT elements.

Table S4. Predicted miR-297 target mRNA list using the TargetScan web tool.

Table S5. List of 97 potential target mRNAs regulated by hnRNP L-directed, miR-297-dependent RNA switch.

Table S6. Taqman probes used in qPCR analysis

| <b>Gene</b> | <b>Catalog No. of probes</b> |
|-------------|------------------------------|
| VEGFA       | 4331182; Hs00900055_m1       |
| DNM1L       | 4331182; Hs01552605_m1       |
| PHF21A      | 4331182; Hs01046543_m1       |
| CDK6        | 4331182; Hs01026371_m1       |
| EIF5        | 4331182; Hs01028811_g1       |
| MKLN1       | 4331182; Hs00183783_m1       |
| GAPDH       | 4331182; Hs02786624_g1       |
| ACTB        | 4331182; Hs99999903_m1       |

Table S7. Antibodies used for IP and Western blot analyses

| <b>Antibodies</b>       | <b>Source</b> | <b>Identifier</b> | <b>Diluter</b>                      |
|-------------------------|---------------|-------------------|-------------------------------------|
| EPRS antibody           | Custom made   | NA                | IP 1:500 ( <i>Cell</i> 149: 88-100) |
| hnRNP L antibody        | Novus         | NB120-6106        | IP 1:500; IB 1:2000                 |
| $\beta$ -actin antibody | Biovision     | 3662-100          | IB 1:1000                           |
| DNM1L antibody          | GeneTex       | GTx109745         | IB 1:500                            |
| PHF21A antibody         | Abnova        | 331-430           | IB 1:500                            |
| CDK6 antibody           | CST           | 3136P             | IB 1:1000                           |
| Caspase 3 antibody      | CST           | 9662P             | IB 1:1000                           |
| PARP antibody           | CST           | 9542S             | IB 1:1000                           |
| Phospho-Tyr antibody    | Santa Cruz    | sc-7020           | IB 1:500                            |
| Mouse IgG               | Santa Cruz    | sc-2025           | IP 1:500                            |
| Rabbit IgG              | Santa Cruz    | sc-2027           | IP 1:500                            |
